# Supplementary material
Source: PubMed Central journal article supplement (PMC4075986)
Supplement: bi500162z_si_001.pdf [file bi500162z_si_001.pdf]

## **Supporting Information for:**

### **Regulation of nonmuscle myosin II by tropomyosin**

Bipasha Barua<sup>\*,a</sup>, Attila Nagy<sup>b</sup>, James R. Sellers<sup>b</sup>, and Sarah E. Hitchcock-DeGregori<sup>a</sup>

<sup>a</sup>Department of Pathology and Laboratory Medicine, Robert Wood Johnson Medical School, Rutgers University, Piscataway, NJ and <sup>b</sup>Laboratory of Molecular Physiology, NHLBI, NIH, Bethesda, MD

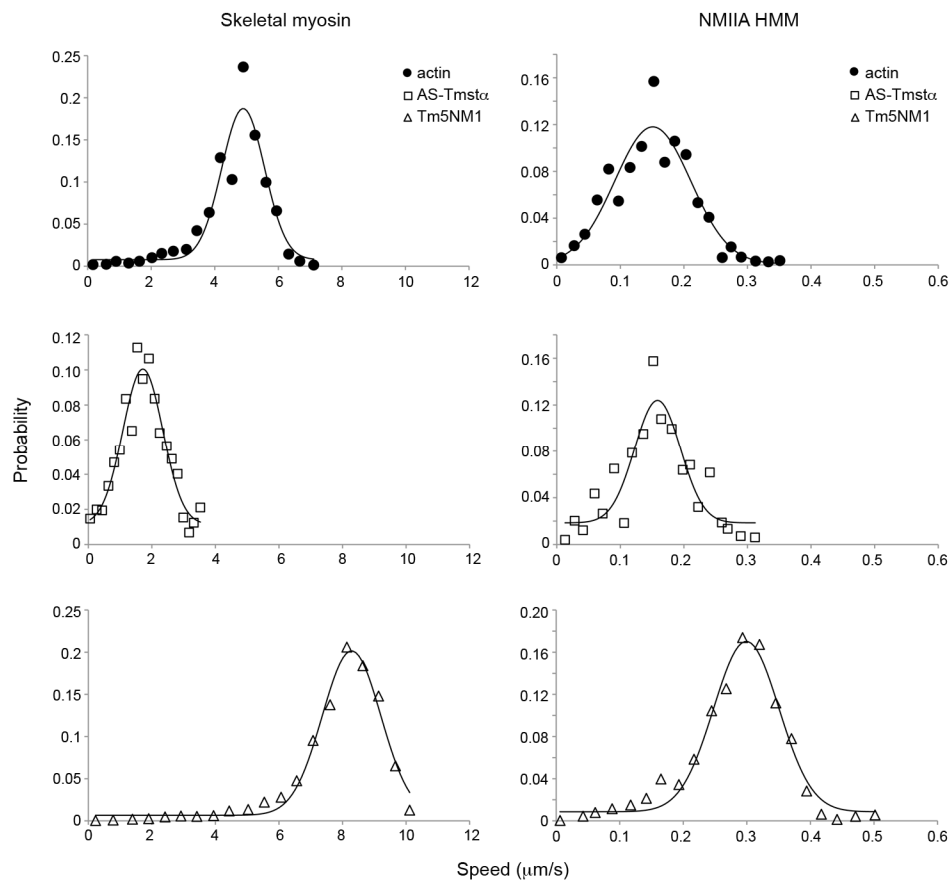

**FIGURE S1.** Velocity probability distributions for actin, actin-AS-Tmst̑ and actin-Tm5NM1 on skeletal myosin and NMIIA HMM. Each plot is from a representative experiment. The data was fit to a Gaussian distribution to determine the mean speed  $\pm$  S.D. for each experiment.

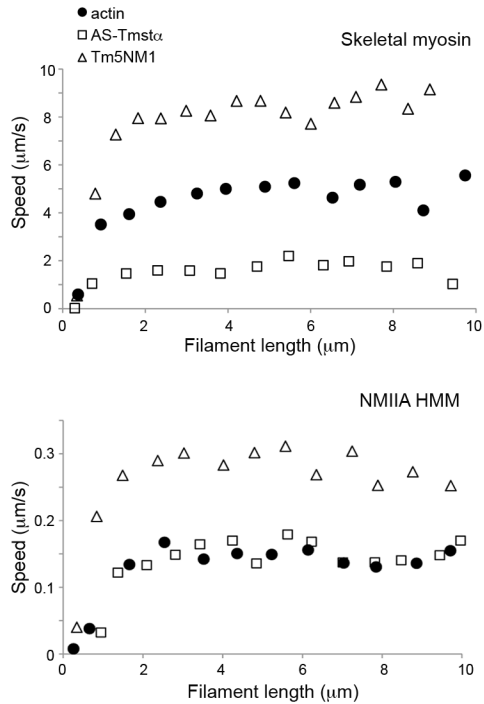

**FIGURE S2.** The speeds of individual actin, actin-AS-Tmst $\alpha$  and actin-Tm5NM1 filaments on skeletal myosin and NMIIA HMM as a function of filament length. Each plot is from a representative experiment. The speed is independent of filament length except for very short filaments ( $<1 \mu\text{m}$ ).

## MOVIE LEGENDS

**MOVIE S1.** *In vitro* motility assays for actin (A), actin-AS-Tmst $\alpha$  (B) and actin-Tm5NM1 (C) filaments moving on skeletal myosin (40  $\mu\text{g/ml}$ ). The video shows the first 500 frames out of a total of 1000 frames at 2x speed (30 fps) of the original recording (15 fps).

**MOVIE S2.** *In vitro* motility assays for actin (A), actin-AS-Tmst $\alpha$  (B) and actin-Tm5NM1 (C) filaments moving on NMIIA HMM (60  $\mu\text{g/ml}$ ). The video shows the first 500 frames out of a total of 1000 frames at 5x speed (30 fps) of the original recording (6 fps).
